# Supplementary material
Source: PubMed Central journal article supplement (PMC3440006)
Supplement: Supp_Data.pdf [file Supp_Data.pdf]

## Supplementary Material

Here, we shall present the results on the consistency and normal limiting distributions of the maximum likelihood estimators of the main parameters of the Y-linked BBP with preference, when the entire family tree up to some generation is observed. First, we shall derive these estimators.

**Theorem 1** *The maximum likelihood estimators of  $\alpha$ ,  $p^R$ , and  $p^r$  based on the sample  $(\mathcal{Z}_N, \mathcal{FM}_N)$  are, respectively,*

$$\hat{\alpha} = \frac{\sum_{n=0}^{N-1} F_{n+1}}{\sum_{n=0}^{N-1} (F_{n+1} + MR_{n+1} + Mr_{n+1})},$$

$$\hat{p}_k^R = \frac{\sum_{n=0}^{N-1} ZR_n(k)}{\sum_{n=0}^{N-1} ZR_n}, \quad k \in S^R, \quad \text{and} \quad \hat{p}_l^r = \frac{\sum_{n=0}^{N-1} Zr_n(l)}{\sum_{n=0}^{N-1} Zr_n}, \quad l \in S^r.$$

**Proof.** It is immediate to verify from Equation (5) in the paper, that the expression for the complete log-likelihood function based on such sample is

$$l(p^R, p^r, \alpha | \mathcal{Z}_N, \mathcal{FM}_N) = C^* + \sum_{n=0}^{N-1} (F_{n+1} \log \alpha + (MR_{n+1} + Mr_{n+1}) \log(1 - \alpha))$$

$$+ \sum_{n=0}^{N-1} \left( \sum_{k \in S^R} ZR_n(k) \log p_k^R + \sum_{l \in S^r} Zr_n(l) \log p_l^r \right),$$

with  $C^*$  some constant.

Given the structure of that function, to maximize this expression subject to the constraints  $0 \leq \alpha \leq 1$ ,  $\sum_{k \in S^R} p_k^R = 1$  and  $\sum_{l \in S^r} p_l^r = 1$ , with  $p_k^R, p_l^r \geq 0$ ,  $k \in S^R$  and  $l \in S^r$ , it is enough to maximize each corresponding addend. Using the non-negativity of the Kullback-Leibler divergence, it is straightforward to verify that the log-likelihood is maximized by the choice of  $\hat{\alpha}$ ,  $\hat{p}_k^R$ , and  $\hat{p}_l^r$ , and therefore they are the MLEs for  $\alpha$ ,  $p^R$ , and  $p^r$ .  $\blacksquare$

**Corollary 1** *The maximum likelihood estimators of  $m_R$  and  $m_r$  based on the sample  $(\mathcal{Z}_N, \mathcal{FM}_N)$  are, respectively,*

$$\hat{m}_R = \frac{\sum_{n=1}^N (FR_n + MR_n)}{\sum_{n=0}^{N-1} ZR_n} \quad \text{and} \quad \hat{m}_r = \frac{\sum_{n=1}^N (Fr_n + Mr_n)}{\sum_{n=0}^{N-1} Zr_n}.$$

In the following results some asymptotic properties of the estimators  $\hat{\alpha}$ ,  $\hat{p}_k^R$  with  $k \in S^R$ ,  $\hat{p}_l^r$  with  $l \in S^r$ ,  $\hat{m}_R$ , and  $\hat{m}_r$  are studied. First, we shall deal with the results about their consistency, establishing previously some properties we shall need in the development of those results.

**P1.**  $\liminf_{n \rightarrow \infty} \frac{ZR_{n+1}}{ZR_n} > 1$  a.s. on  $A_{\infty, \infty} \cup A_{\infty, 0}$

**P2.**  $\liminf_{n \rightarrow \infty} \frac{Zr_{n+1}}{Zr_n} > 1$  a.s. on  $A_{\infty, \infty} \cup A_{0, \infty}$

**P3.**  $\lim_{n \rightarrow \infty} \frac{FR_{n+1}}{ZR_n} = \alpha m_R$  and  $\lim_{n \rightarrow \infty} \frac{MR_{n+1}}{ZR_n} = (1 - \alpha) m_R$  a.s. on  $A_{\infty, \infty} \cup A_{\infty, 0}$

**P4.**  $\lim_{n \rightarrow \infty} \frac{Fr_{n+1}}{Zr_n} = \alpha m_r$  and  $\lim_{n \rightarrow \infty} \frac{Mr_{n+1}}{Zr_n} = (1 - \alpha) m_r$  a.s. on  $A_{\infty, \infty} \cup A_{0, \infty}$

where  $A_{\infty,0} = \{ZR_n \rightarrow \infty, Zr_n \rightarrow 0\}$ ,  $A_{0,\infty} = \{ZR_n \rightarrow 0, Zr_n \rightarrow \infty\}$  and  $A_{\infty,\infty} = \{ZR_n \rightarrow \infty, Zr_n \rightarrow \infty\}$ .

Intuitively,  $A_{\infty,0}$  (resp.  $A_{0,\infty}$ ) means the fixation of the  $R$  allele (resp.  $r$  allele) and  $A_{\infty,\infty}$  the survival or coexistence of both genotypes. Moreover, notice that  $A_{\infty,0} \cup A_{\infty,\infty} = \{ZR_n \rightarrow \infty\}$ , which corresponds to the survival of the  $R$  allele independently of the behaviour of the  $r$  allele, and that  $A_{0,\infty} \cup A_{\infty,\infty} = \{Zr_n \rightarrow \infty\}$  with analogous meaning.

**Remark 1** *Sufficient conditions for the sets  $A_{\infty,0}$ ,  $A_{0,\infty}$ , and  $A_{\infty,\infty}$  to have positive probability are given in González et al. (2006) and González et al. (2008), and conditions which guarantee **P1-P2** have been studied in González et al. (2008). Notice that, from **P1-P2** and using the conditioned Borel-Cantelli lemma, one can obtain **P3-P4**.*

**Theorem 2** *The maximum likelihood estimators of  $p^R$ ,  $p^r$ , and  $\alpha$  based on  $(\mathcal{Z}_N, \mathcal{FM}_N)$  verify:*

- i) If **P1** holds, then for each  $k \in S^R$ ,  $\hat{p}_k^R$  is strongly consistent for  $p_k^R$  on  $A_{\infty,\infty} \cup A_{\infty,0}$ .*
- ii) If **P2** holds, then for each  $l \in S^r$ ,  $\hat{p}_l^r$  is strongly consistent for  $p_l^r$  on  $A_{\infty,\infty} \cup A_{0,\infty}$ .*
- iii) If **P3** and **P4** hold and  $\lim_{n \rightarrow \infty} \frac{ZR_n}{Zr_n}$  exists a.s. on  $A_{\infty,\infty}$  (it could be  $\infty$ ), then  $\hat{\alpha}$  is strongly consistent for  $\alpha$  on  $A_{\infty,0} \cup A_{0,\infty} \cup A_{\infty,\infty}$ .*

**Proof.** We start by proving *i*). The proof of *ii*) is analogous using the property **P2**. Firstly, we define the filtration  $\mathcal{F}_n = \sigma(ZR_0, Zr_0, F_k, MR_k, Mr_k, k = 1, 2, \dots, n)$ ,  $n \geq 1$ . Let  $\varepsilon > 0$ ,  $k \in S^R$  and define  $A_n = \{|ZR_n(k) - p_k^R ZR_n| \geq \varepsilon ZR_n\}$ ,  $n \geq 0$ . Taking into account that the conditional distribution of  $(ZR_n(k), k \in S^R)$  given  $ZR_n$  is a multinomial distribution with size  $ZR_n$  and probability  $p^R$ , then  $E[ZR_n(k)|ZR_n] = ZR_n p_k^R$  a.s. and  $Var[ZR_n(k)|ZR_n] = ZR_n p_k^R (1 - p_k^R)$  a.s. Applying Chebyshev's inequality, from **P1** one obtains

$$\sum_{n=1}^{\infty} P(A_n | \mathcal{F}_n) \leq \sum_{n=1}^{\infty} \frac{Var[ZR_n(k)|ZR_n]}{\varepsilon^2 ZR_n^2} = \frac{p_k^R (1 - p_k^R)}{\varepsilon^2} \sum_{n=1}^{\infty} \frac{1}{ZR_n} < \infty$$

a.s. on  $\{ZR_n \rightarrow \infty\}$ .

Then, using the conditioned Borel-Cantelli lemma,

$$\{ZR_n \rightarrow \infty\} \subseteq \left\{ \sum_{n=1}^{\infty} P(A_n | \mathcal{F}_n) < \infty \right\} = \liminf_{n \rightarrow \infty} A_n^c \text{ a.s.}$$

So, taking into account that  $A_n$  is equal to  $\{|ZR_n(k)ZR_n^{-1} - p_k^R| \geq \varepsilon\}$  on  $\{ZR_n \rightarrow \infty\}$ , one has that  $\lim_{n \rightarrow \infty} ZR_n(k)ZR_n^{-1} = p_k^R$  a.s. on  $\{ZR_n \rightarrow \infty\}$ . The proof is completed by applying the Toeplitz lemma.

To finish, we prove *iii*). This will be done by proving that

$$\lim_{n \rightarrow \infty} \frac{F_{n+1}}{F_{n+1} + MR_{n+1} + Mr_{n+1}} = \alpha \text{ a.s.} \quad (1)$$

on each of the sets  $A_{\infty,0}$ ,  $A_{0,\infty}$ , and  $A_{\infty,\infty}$ . Again, the Toeplitz lemma is used to conclude the proof.

We shall prove (1) on  $A_{\infty,0}$ . The proof on  $A_{0,\infty}$  is analogous. Taking into account **P3**, and from one generation onwards (which depends on the realization of the process), the offspring

given by  $r$  couples is null on  $A_{\infty,0}$ . Then, recalling that  $F_n = FR_n + Fr_n$ , for  $n = 1, 2, \dots$ ,

$$\begin{aligned} \lim_{n \rightarrow \infty} \frac{F_{n+1}}{F_{n+1} + MR_{n+1} + Mr_{n+1}} &= \lim_{n \rightarrow \infty} \frac{\frac{FR_{n+1}}{ZR_n}}{\frac{FR_{n+1}}{ZR_n} + \frac{MR_{n+1}}{ZR_n}} \\ &= \frac{\alpha m_R}{\alpha m_R + (1 - \alpha)m_R} \\ &= \alpha \text{ a.s. on } A_{\infty,0}. \end{aligned}$$

To prove the result on  $A_{\infty,\infty}$ , the relation between  $ZR_n$  and  $Zr_n$  must be taken into account because, a.s. on  $A_{\infty,\infty}$ ,

$$\lim_{n \rightarrow \infty} \frac{F_{n+1}}{F_{n+1} + MR_{n+1} + Mr_{n+1}} = \lim_{n \rightarrow \infty} \frac{\frac{FR_{n+1}}{ZR_n} \frac{ZR_n}{Zr_n} + \frac{Fr_{n+1}}{Zr_n}}{\frac{FR_{n+1}}{ZR_n} \frac{ZR_n}{Zr_n} + \frac{Fr_{n+1}}{Zr_n} + \frac{MR_{n+1}}{ZR_n} \frac{ZR_n}{Zr_n} + \frac{Mr_{n+1}}{Zr_n}}. \quad (2)$$

Then, as by hypothesis there exists  $\lim_{n \rightarrow \infty} ZR_n Zr_n^{-1}$  a.s. on  $A_{\infty,\infty}$  (it could be  $\infty$ ), one has:

- a) If  $\lim_{n \rightarrow \infty} ZR_n Zr_n^{-1} = 0$  a.s. on  $A_{\infty,\infty}$ , i.e., if  $\{Zr_n\}_{n \geq 0}$  has a faster growth than  $\{ZR_n\}_{n \geq 0}$ , taking into account **P3** and **P4**, the right-hand side of (2) is a.s. on  $A_{\infty,\infty}$  equal to

$$\frac{\alpha m_r}{\alpha m_r + (1 - \alpha)m_r} = \alpha.$$

- b) If  $\lim_{n \rightarrow \infty} Zr_n ZR_n^{-1} = 0$  a.s. on  $A_{\infty,\infty}$ , i.e., if  $\{ZR_n\}_{n \geq 0}$  has a faster growth than  $\{Zr_n\}_{n \geq 0}$ , from **P3** and **P4** one obtains an analogous result to a).
- c) If  $\lim_{n \rightarrow \infty} ZR_n Zr_n^{-1} = X$  a.s. on  $A_{\infty,\infty}$  with  $X$  a random variable,  $0 < X < \infty$ , i.e., if both have a similar growth, from **P3** and **P4**, the right hand of (2) is a.s. on  $A_{\infty,\infty}$  equal to

$$\frac{\alpha m_R X + \alpha m_r}{\alpha m_R X + \alpha m_r + (1 - \alpha)m_R X + (1 - \alpha)m_r} = \frac{\alpha(m_R X + m_r)}{m_R X + m_r} = \alpha. \quad \blacksquare$$

**Corollary 2** *The maximum likelihood estimators of  $m_R$  and  $m_r$  based on  $(\mathcal{Z}_N, \mathcal{FM}_N)$  verify:*

- i) *If **P3** holds, then  $\hat{m}_R$  is strongly consistent for  $m_R$  on  $A_{\infty,\infty} \cup A_{\infty,0}$ .*
- ii) *If **P4** holds, then  $\hat{m}_r$  is strongly consistent for  $m_r$  on  $A_{\infty,\infty} \cup A_{0,\infty}$ .*

Finally, we shall obtain some results on the asymptotic distribution of the derived maximum likelihood estimators. Previously, we shall need to assume some working hypotheses in order to develop these results.

- H1.**  $P(A_{\infty,0}) > 0$ , and there exist  $\rho_R > 1$  and a random variable  $W_R$  such that  $\{\rho_R^{-n} ZR_n\}_{n \geq 0}$  converges to  $W_R$  a.s. on  $A_{\infty,0}$  and  $A_{\infty,0} \subseteq \{0 < W_R < \infty\}$  a.s.
- H2.**  $P(A_{\infty,\infty}) > 0$ , and there exist  $\rho_R^* > 1$  and a random variable  $W_R^*$  such that  $\{\rho_R^{*-n} ZR_n\}_{n \geq 0}$  converges to  $W_R^*$  a.s. on  $A_{\infty,\infty}$  and  $A_{\infty,\infty} \subseteq \{0 < W_R^* < \infty\}$  a.s.

**Remark 2** *Conditions which guarantee **H1** and **H2** have been studied in González et al. (2008).*

We shall denote  $P_{\mathcal{B}}(\cdot) = P(\cdot | \mathcal{B})$  for any set  $\mathcal{B}$ , and write  $[x]$  to indicate the greatest integer number less than or equal to  $x$ .

The maximum likelihood estimator of  $p^R$  based on  $(\mathcal{Z}_N, \mathcal{FM}_N)$  verifies the following asymptotic properties.

**Theorem 3** If  $P'$  is an absolutely continuous probability with respect to  $P_{\mathcal{D}}$  ( $P' \ll P_{\mathcal{D}}$ ) then, for any  $x \in \mathbb{R}$ , the maximum likelihood estimator of  $p_k^R$ , with  $k \in S^R$ , verifies that

$$\lim_{N \rightarrow \infty} P' \left( (p_k^R(1-p_k^R))^{-1/2} \left( \sum_{n=1}^N ZR_{n-1} \right)^{1/2} (\hat{p}_k^R - p_k^R) \leq x \right) = \phi(x),$$

with  $\phi(x)$  being the standard normal distribution function, and where

i) if **H1** holds,  $\mathcal{D} = A_{\infty,0}$ ;

ii) if **H2** holds  $\mathcal{D} = A_{\infty,\infty}$ .

**Proof.** Defining  $TR_{01} = FR_{01} + MR_{01}$ , the following equality is verified in distribution

$$\hat{p}_k^R = \frac{\sum_{n=1}^N ZR_{n-1}(k)}{\sum_{n=1}^N ZR_{n-1}} \stackrel{d}{=} \frac{\sum_{i=1}^{\sum_{n=1}^N ZR_{n-1}} I_{\{TR_{0i}=k\}}}{\sum_{n=1}^N ZR_{n-1}},$$

(recall that  $I_A$  is the indicator function of a set  $A$ ). From this, one has, for all  $x \in \mathbb{R}$ , that

$$\begin{aligned} & P' \left( (p_k^R(1-p_k^R))^{-1/2} \left( \sum_{n=1}^N ZR_{n-1} \right)^{1/2} (\hat{p}_k^R - p_k^R) \leq x \right) \\ = & P' \left( (p_k^R(1-p_k^R))^{-1/2} \left( \sum_{n=1}^N ZR_{n-1} \right)^{-1/2} \sum_{i=1}^{\sum_{n=1}^N ZR_{n-1}} (I_{\{TR_{0i}=k\}} - p_k^R) \leq x \right). \end{aligned}$$

First we shall deal with the proof of the result in the case i). Taking into account that **H1** holds and Cesaro's lemma, one has that, as  $N \rightarrow \infty$ ,

$$(\rho_R)^{-N} \sum_{n=1}^N ZR_{n-1} \rightarrow (\rho_R - 1)^{-1} W_R \quad \text{a.s. on } A_{\infty,0}.$$

Thus to conclude it is sufficient to apply Theorem I in Dion (1974), with

$$a_N = \rho_R^N, \quad \nu_N = \sum_{n=1}^N ZR_{n-1}, \quad \Theta = (\rho_R - 1)^{-1} W_R$$

and, for  $0 \leq t \leq 1$ ,

$$Y_N(t, \omega) = \left( p_k^R(1-p_k^R) \sum_{n=1}^N ZR_{n-1}(\omega) \right)^{-1/2} \sum_{i=1}^{\sum_{n=1}^N ZR_{n-1}(\omega)t} (I_{\{TR_{0i}=k\}}(\omega) - p_k^R).$$

The proof in case ii) is analogous. ■

**Corollary 3** If **H1** and **H2** hold, then, for any  $x \in \mathbb{R}$ , the maximum likelihood estimator of  $p_k^R$ , with  $k \in S^R$ , verifies that

$$\lim_{N \rightarrow \infty} P_{\{ZR_n \rightarrow \infty\}} \left( (p_k^R(1-p_k^R))^{-1/2} \left( \sum_{n=1}^N ZR_{n-1} \right)^{1/2} (\hat{p}_k^R - p_k^R) \leq x \right) = \phi(x),$$

with  $\phi(x)$  being the standard normal distribution function.

**Remark 3** By Lemma 2.3 in Guttorp (1991), the probability  $P_{\{ZR_n \rightarrow \infty\}}$  in Corollary 3 can be replaced by  $P_{\{ZR_{N-1} > 0\}}$ . Hence, taking into account *i*) in Proposition 2 and applying the Slutsky theorem, one obtains that if  $ZR_{N-1} > 0$  then the  $(1 - \gamma)$ -level asymptotic confidence interval for  $p_k^R$  is

$$\hat{p}_k^R \pm z_\gamma \sqrt{\hat{p}_k^R (1 - \hat{p}_k^R) \left( \sum_{n=1}^N ZR_{n-1} \right)^{-1}},$$

where  $z_\gamma$  satisfies  $\phi(z_\gamma) = 1 - \gamma/2$  with  $\gamma \in (0, 1)$ , and  $\phi(x)$  is the standard normal distribution function.

**Remark 4** Analogous asymptotic distribution results to those related to  $\hat{p}_k^R$ , with  $k \in S^R$ , can be obtained for  $\hat{p}_l^r$ , with  $l \in S^r$ , using similar working hypotheses to **H1** and **H2**. Moreover, the asymptotic normality of the (suitably normalized) estimators  $\hat{m}_R$  and  $\hat{m}_r$  can be established by following a similar reasoning to that given in González et al. (2007). Also, asymptotic normality can be derived for  $\hat{\alpha}$ .

## Supplementary Figures

Here, we shall present the figures corresponding to the simulated example given in Section 4.

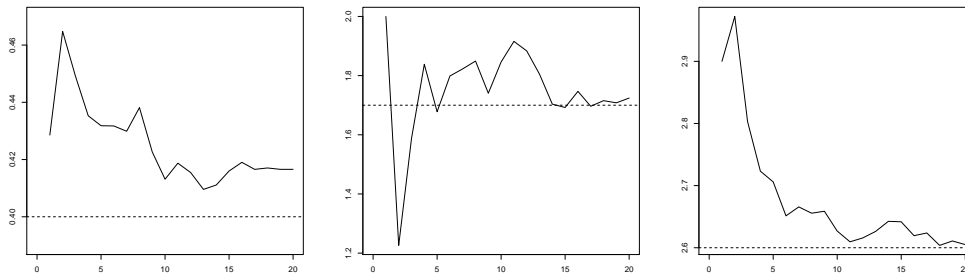

Figure 1: Evolution of  $\hat{\alpha}_{EM}$  (left),  $\hat{m}_R^{EM}$  (centre), and  $\hat{m}_r^{EM}$  (right) over the course of the generations, together with the true value of each parameter (dashed line).

## References

- DION, J. P. (1974). Estimation of the mean and the initial probabilities of a branching process. *J. Appl. Probab.* **11**, 687–694.
- GONZÁLEZ, M., HULL, D. M., MARTÍNEZ, R., & MOTA, M. (2006). Bisexual branching processes in a genetic context: The extinction problem for Y-linked genes. *Math. Biosci.* **202**, 227–247.
- GONZÁLEZ, M., MARTÍNEZ, R., & MOTA, M. (2008). Bisexual branching processes in a genetic context: Rates of growth for Y-linked genes. *Math. Biosci.* **215**, 167–176.
- GONZÁLEZ, M., MOTA, M., & RAMOS, A. (2007). Moment estimation in the class of bisexual branching processes with population-size dependent mating. *Aust. N. Z. J. Stat.* **49(1)**, 37–50.
- GUTTORP, P. (1991). *Statistical Inference for Branching Processes*. John Wiley and Sons, Inc.

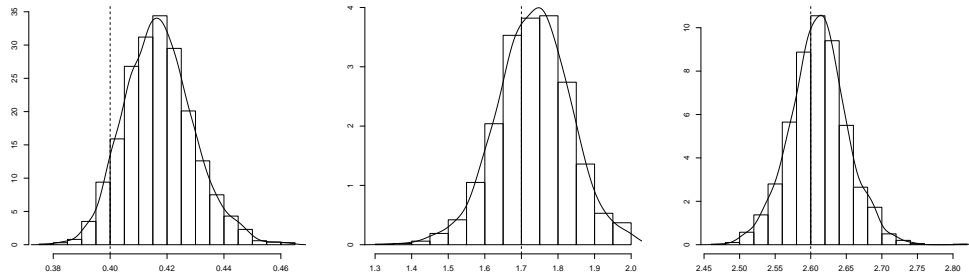

Figure 2: Bootstrap approximation to the sampling distribution of  $\hat{\alpha}_{EM}$  (left),  $\hat{m}_R^{EM}$  (centre), and  $\hat{m}_r^{EM}$  (right), at generation 20, together with the true value of each parameter (dashed line) and kernel density estimates (solid line).

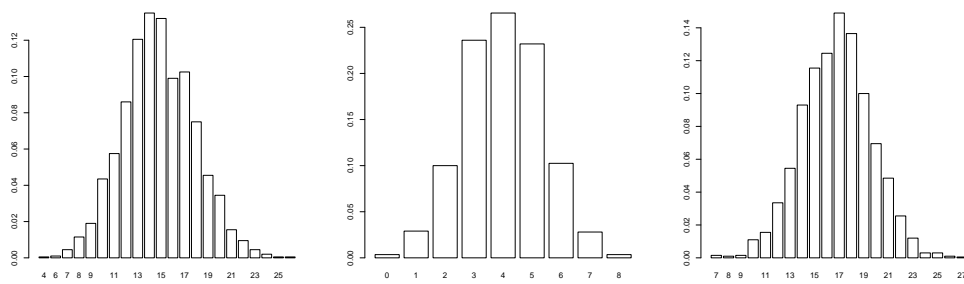

Figure 3: Histogram of the estimated predictive distribution of  $F_{21}$  (left),  $MR_{21}$  (centre), and  $Mr_{21}$  (right), when  $fm_{20}$  is observed.
